# Supplementary material for: The genomic ancestry, landscape genetics and invasion history of introduced mice in New Zealand
Source: PubMed Central journal article supplement (PMC5792881; doi:10.1098/rsos.170879), 2018-01-24

SF1: Neighbour Joining Tree based on IBS calculated in PLINK, for the GigaMUGA combined dataset.

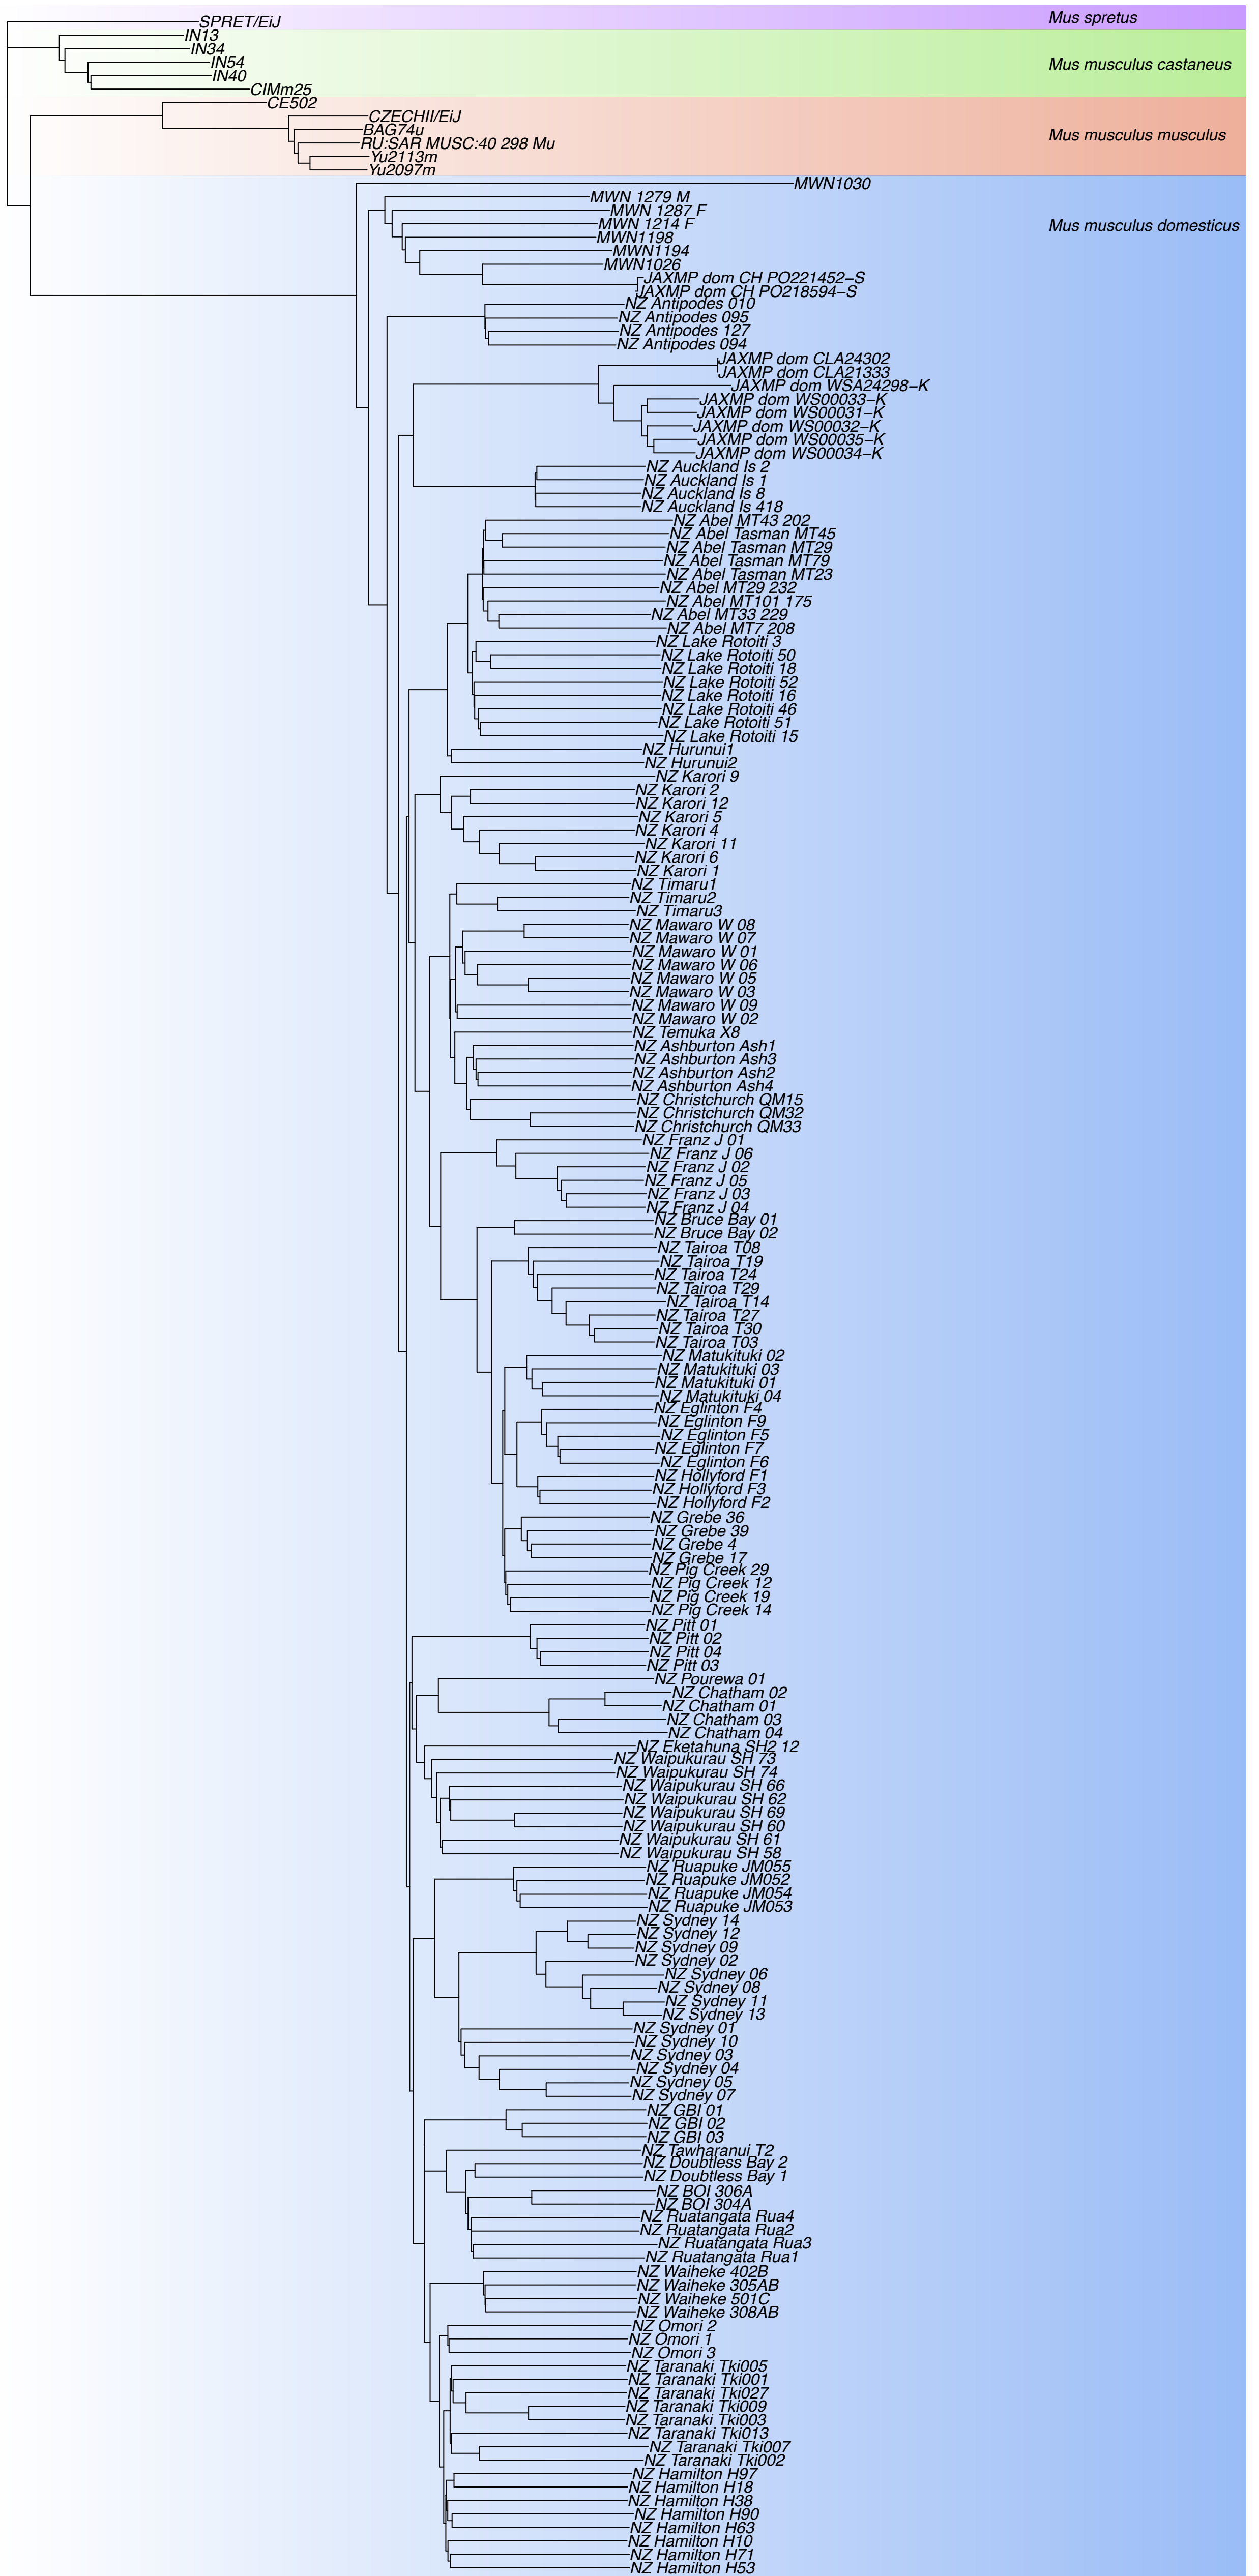

Supplement: rsos170879supp1.pdf [file rsos170879supp1.pdf]
