# Supplementary material for: The genomic ancestry, landscape genetics and invasion history of introduced mice in New Zealand
Source: PubMed Central journal article supplement (PMC5792881; doi:10.1098/rsos.170879), 2018-01-24

Country codes (first two letters of ID) are: BE: Belgium, CH: Switzerland, CN: China, CY: Cyprus, DE: Denmark, DK: Germany, EC: Ecuador, ES: Spain, FR: France, GR: Greece, IN: India, IT: Italy, LB: Lebanon, PL: Poland, PT: Portugal, RU: Russia, TN: Tunisia, TW: Taiwan, UK: United Kingdom, US: United States of America

Subspecies highlighted, tree rooted with *Mus spretus*.

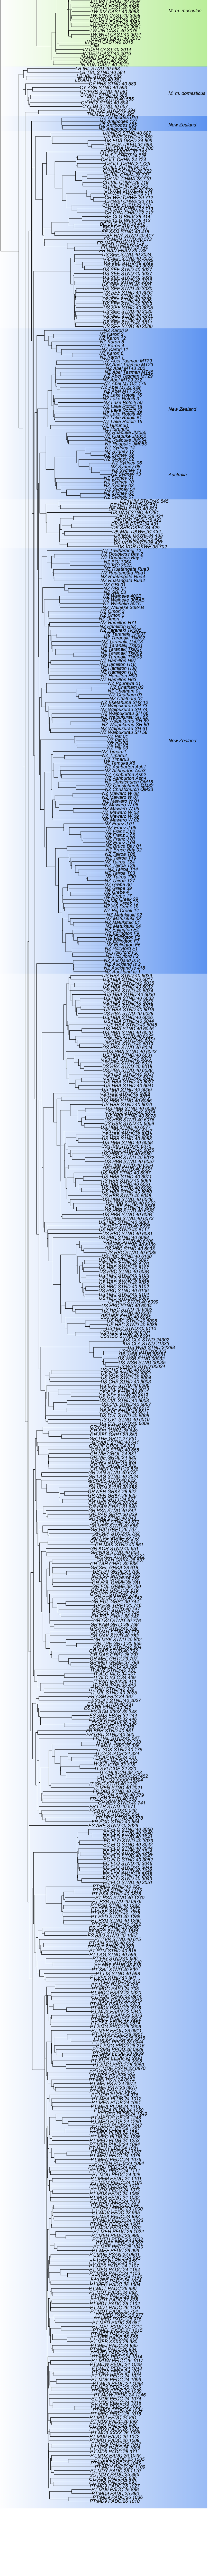

Supplement: rsos170879supp2.pdf [file rsos170879supp2.pdf]
