# Supplementary material for: The genomic ancestry, landscape genetics and invasion history of introduced mice in New Zealand
Source: PubMed Central journal article supplement (PMC5792881; doi:10.1098/rsos.170879), 2018-01-24
Supplement: rsos170879supp3.pdf [file rsos170879supp3.pdf]

Proportion of fixed SNPs (indicating ancestry proportion)

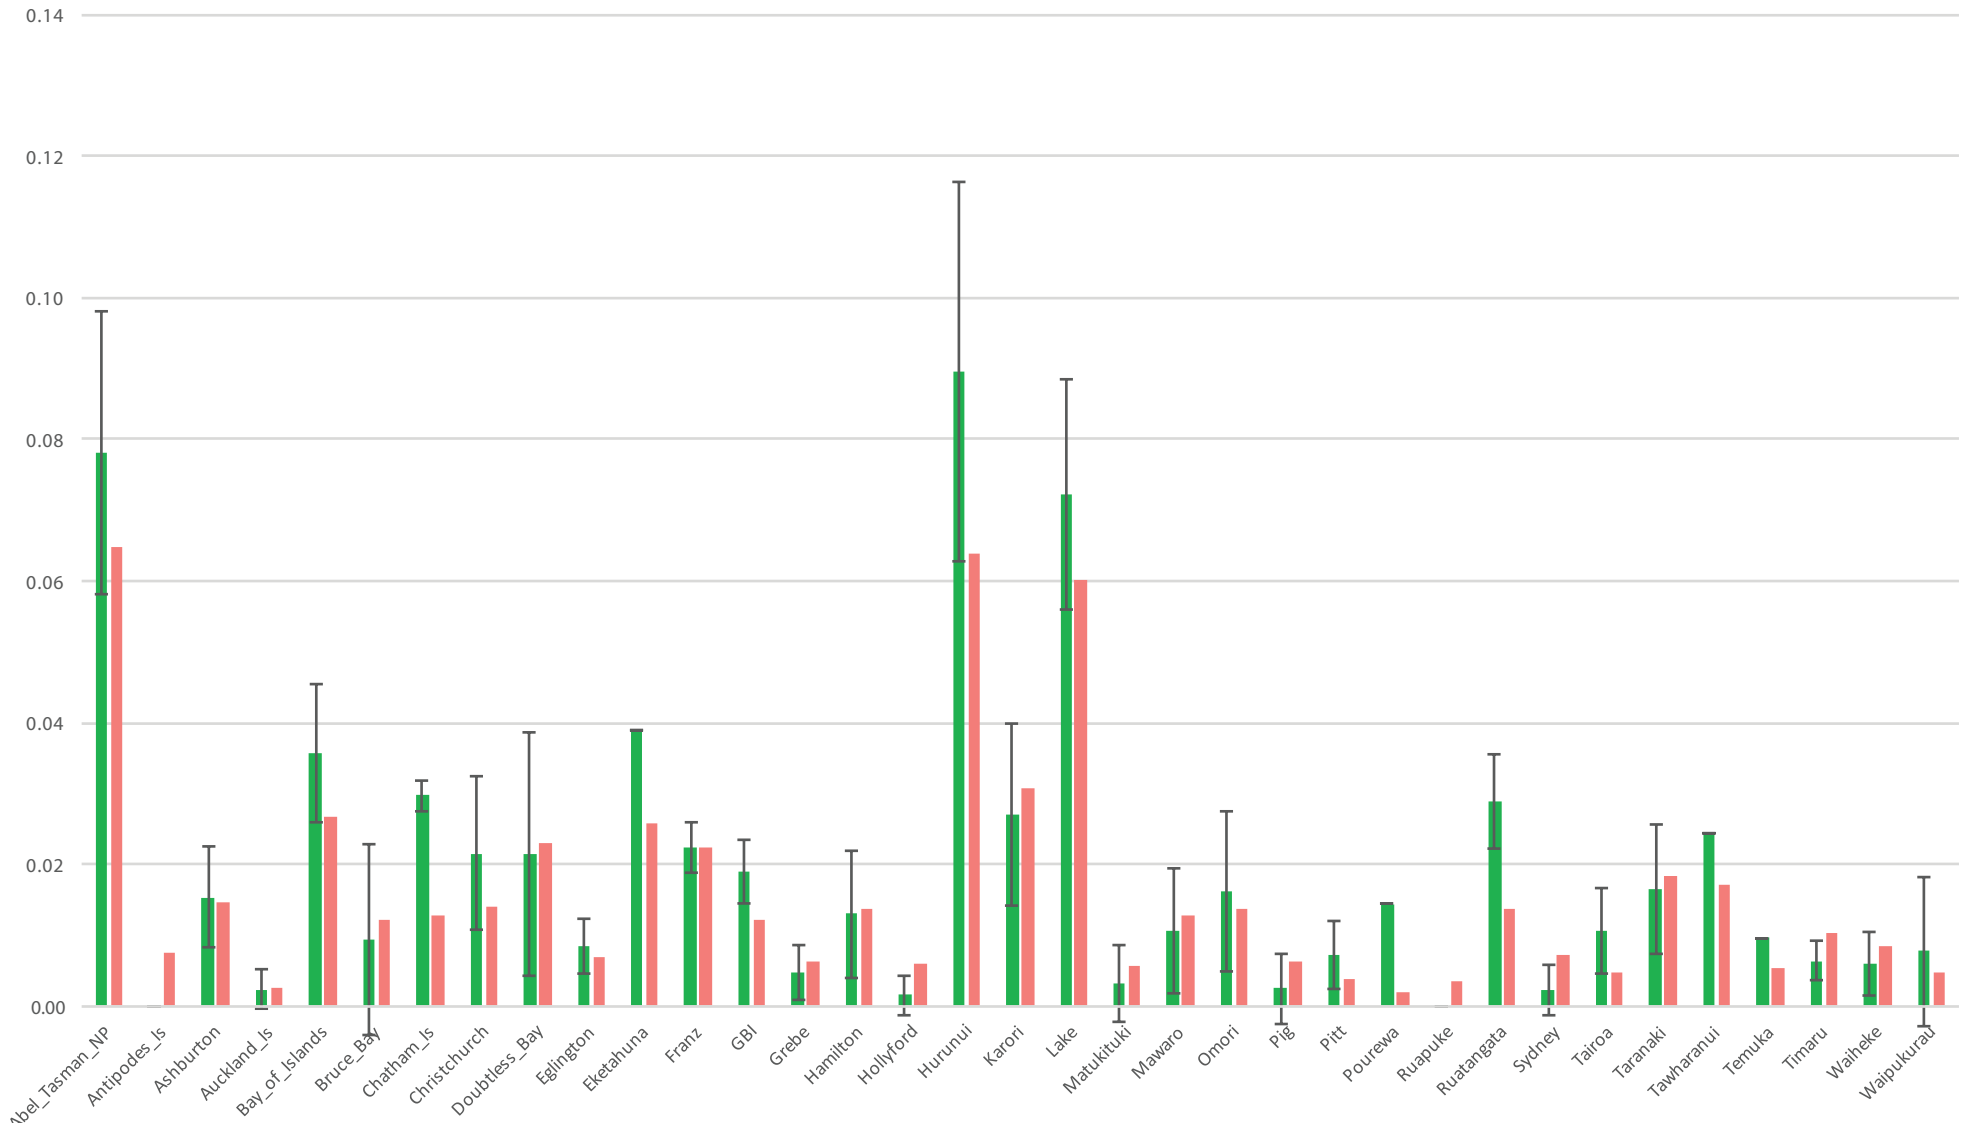

 *M. m. musculus*

 *M. m. castaneus*
